# Supplementary material for: mRNA Therapeutic Vaccine for Hepatitis B Demonstrates Immunogenicity and Efficacy in the AAV-HBV Mouse Model
Source: Vaccines (Basel). 2024 Feb 25;12(3):237. doi: 10.3390/vaccines12030237 (PMC10976109; doi:10.3390/vaccines12030237)
Supplement: Supplementary file 1 [file vaccines-12-00237-s001.zip]

Archive with 9 entries (9 files):
- Figure S1.JPG
- Figure S2.jpg
- Figure S3.jpg
- Figure S4.jpg
- Figure S5.jpg
- Figure S6.jpg
- Figure S7.jpg
- Figure S8.jpg
- mRNA TxVx_DorienDePooter_Suppl.Fig_20240207.pdf
